# Supplementary material for: Theoretically designed two-dimensional γ-C4O as an effective gas separation membrane for hydrogen purification
Source: Royal Society of Chemistry journal article supplement (doi:10.1039/d0cp02640a), 2020-01-01
Supplement: d0cp02640a1.pdf [file d0cp02640a1.pdf]

***Electronic supplementary information (ESI)***

**Theoretically Designed Two-Dimensional  $\gamma$ -C<sub>4</sub>O as Effective Gas  
Separation Membrane for Hydrogen Purification**

Cai Ning<sup>1,2</sup>, Yadong Zhang<sup>3</sup>, Jing Wang<sup>2</sup>, Haiqi Gao<sup>2</sup>, Chuanyun Xiao<sup>2,\*</sup>,

Zhaoshun Meng<sup>4,\*</sup>, Huilong Dong<sup>1,\*</sup>

<sup>1</sup> School of Materials Engineering, Changshu Institute of Technology, Changshu, Jiangsu 215500, China

<sup>2</sup> The Atomic, Molecular & Materials Physics Group, Department of Applied Physics, Nanjing University of Science and Technology, Nanjing, Jiangsu 210094, China

<sup>3</sup> College of Physics and Optoelectronic Engineering, Shenzhen University, Shenzhen, Guangdong 518060, China

<sup>4</sup> New Energy Technology Engineering Laboratory of Jiangsu Province & School of Science, Nanjing University of Posts and Telecommunications, Nanjing, Jiangsu 210023, China

\*Corresponding Authors: [cxiao@njust.edu.cn](mailto:cxiao@njust.edu.cn) (C. Xiao); [zsmeng@njupt.edu.cn](mailto:zsmeng@njupt.edu.cn) (Z. Meng); [huilong\\_dong@126.com](mailto:huilong_dong@126.com) (H. Dong)

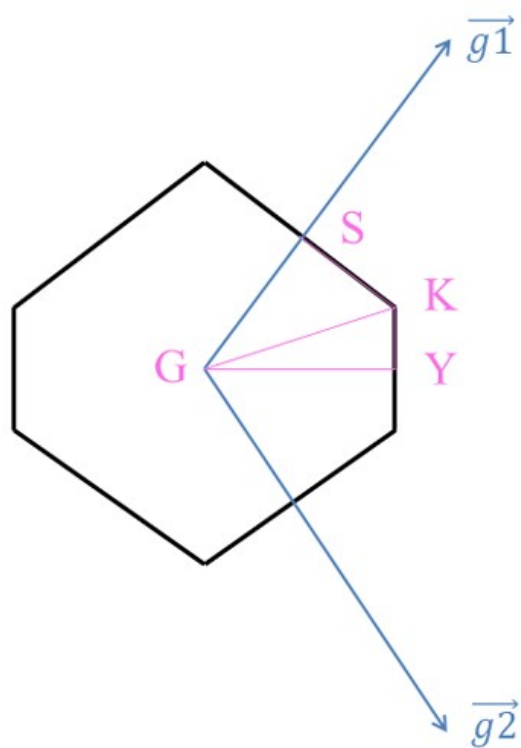

**Fig. S1** Schematic illustration of the first Brillouin zone of  $\gamma$ -C<sub>4</sub>X

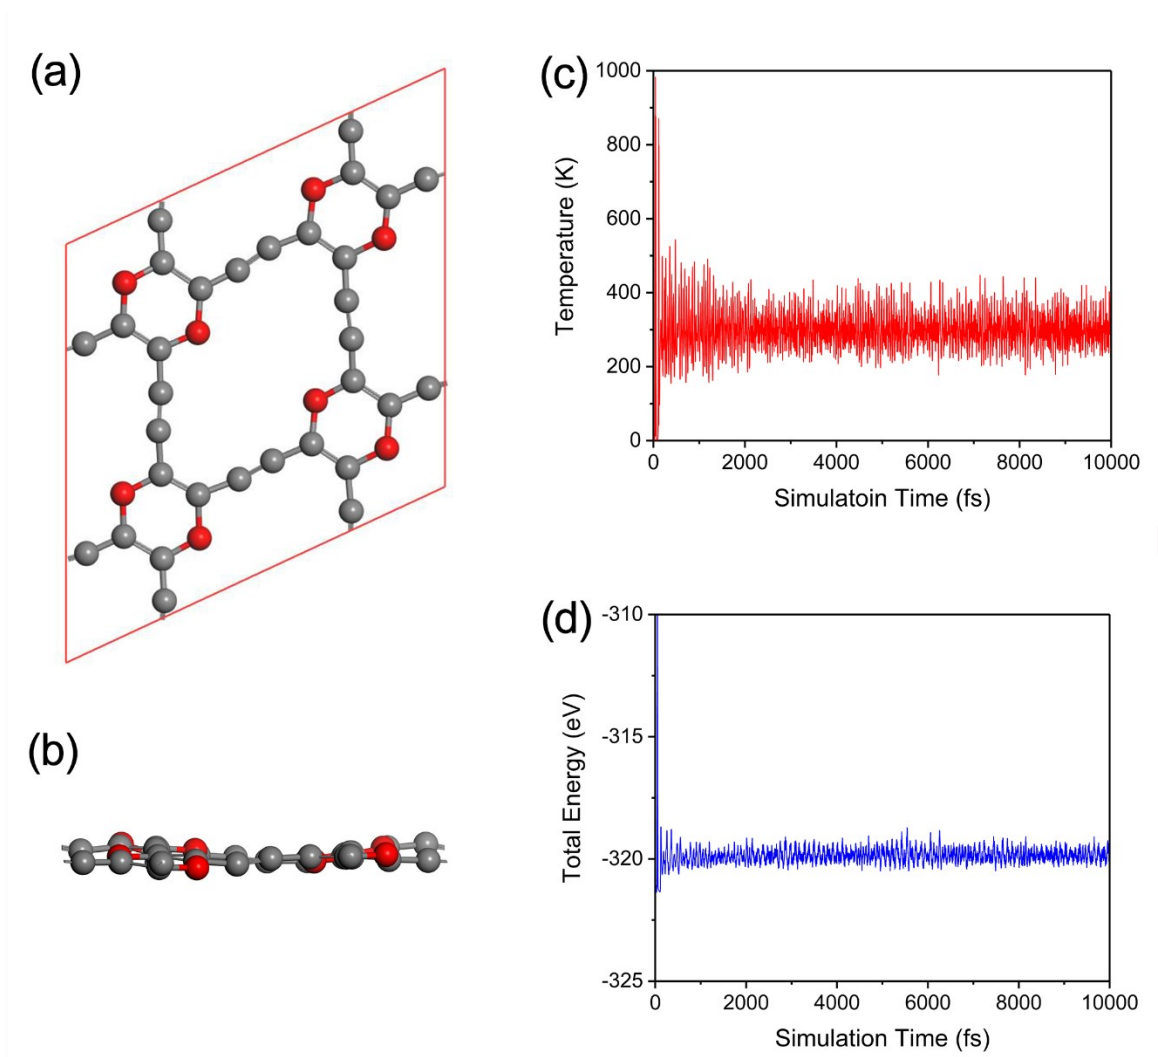

**Fig. S2** (a) Top view and (b) side view of  $\gamma$ -C<sub>4</sub>O after 10 ps FPMD simulation at 300K, and (c) temperature and (d) total energy changes during the simulation. Grey and red balls stand for C and O atoms.

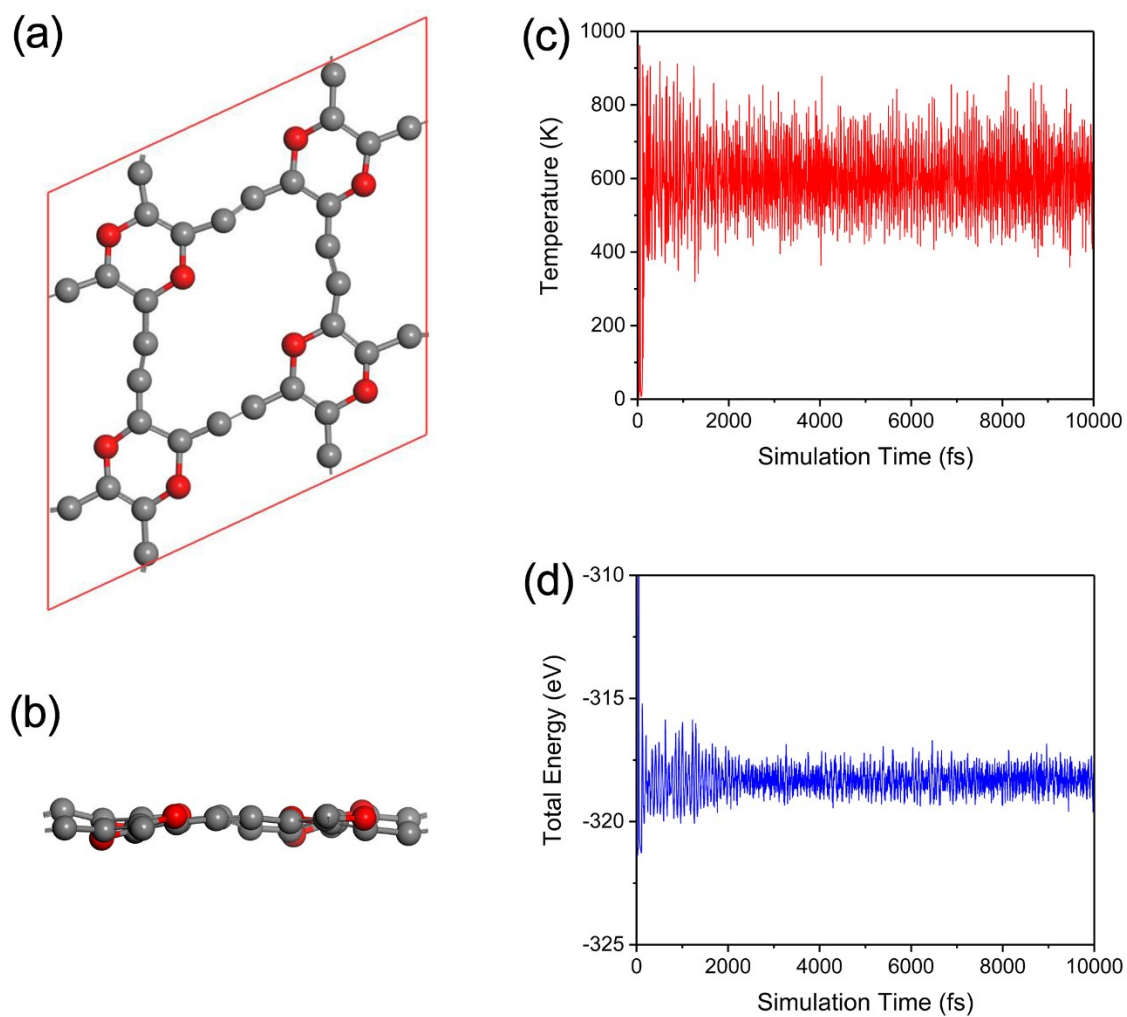

**Fig. S3** (a) Top view and (b) side view of  $\gamma$ -C<sub>4</sub>O after 10 ps FPMD simulation at 600K, and (c) temperature and (d) energy changes during the simulation. Grey and red balls stand for C and O atoms.

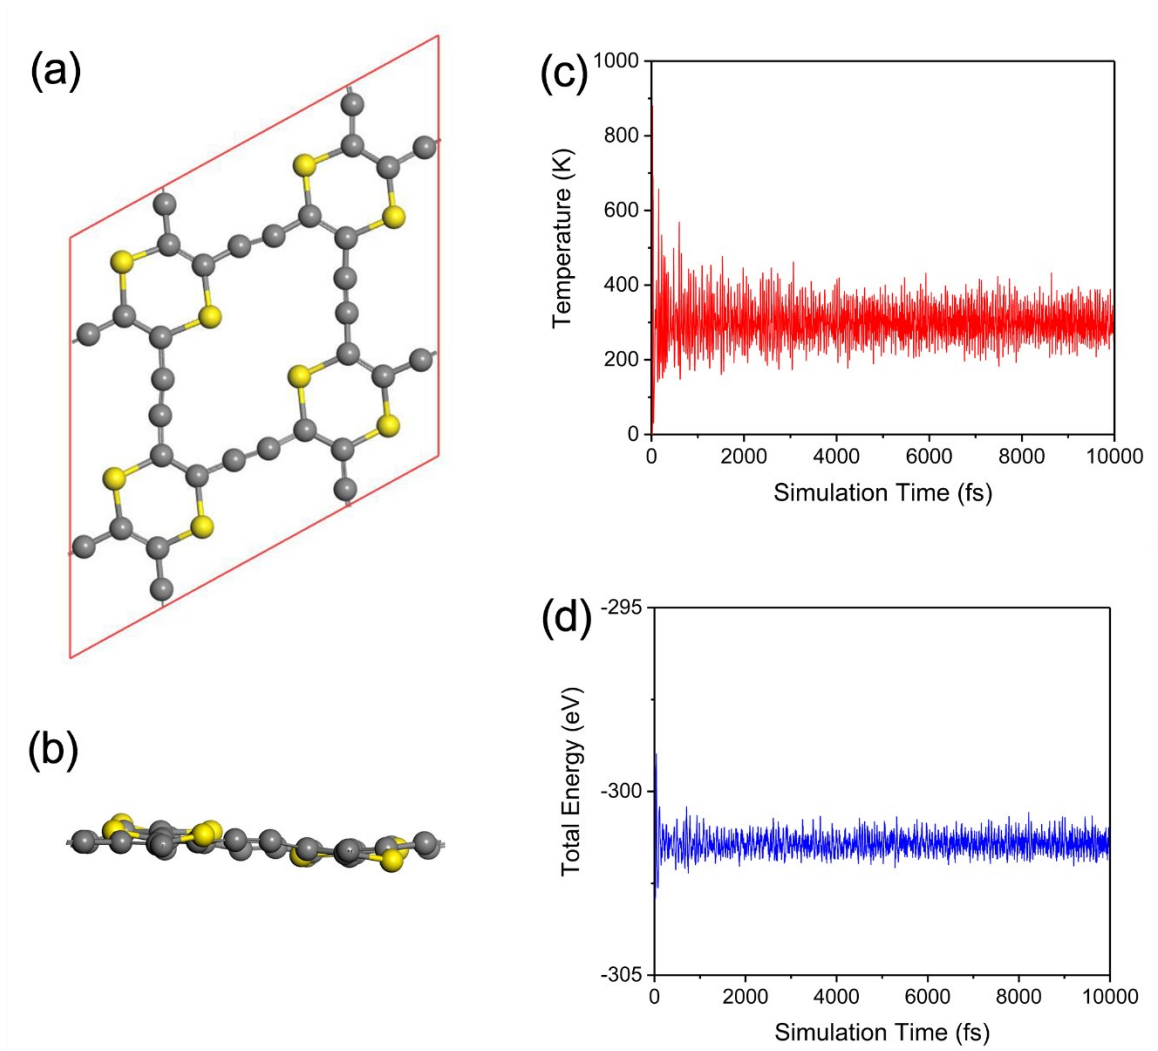

**Fig. S4** (a) Top view and (b) side view of  $\gamma$ -C<sub>4</sub>S after 10 ps FPMD simulation at 300K, and (c) temperature and (d) energy changes during the simulation. Grey and yellow balls stand for C and S atoms.

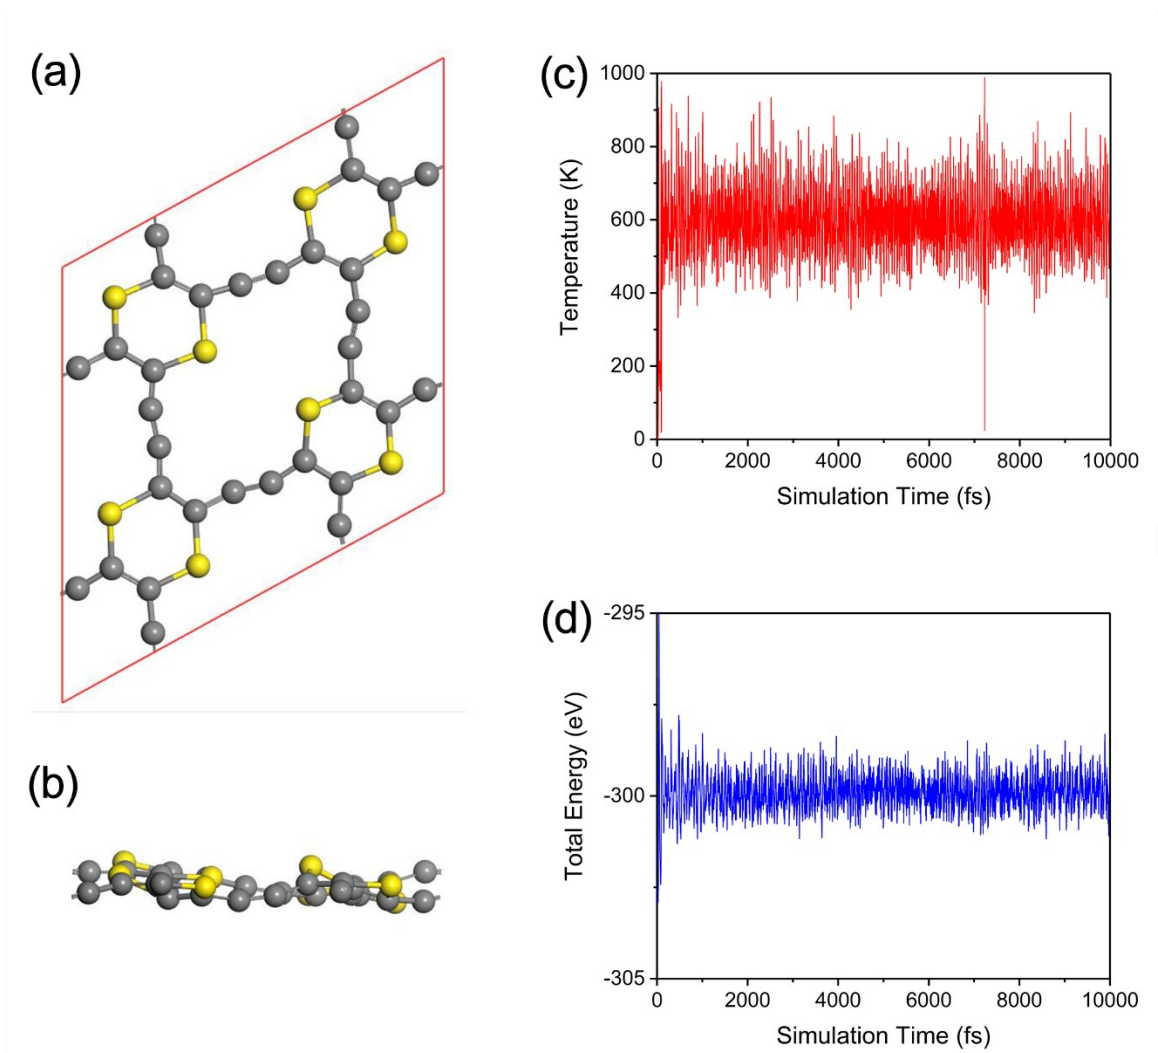

**Fig. S5** (a) Top view and (b) side view of  $\gamma$ -C<sub>4</sub>S after 10 ps FPMD simulation at 600K, and (c) temperature and (d) energy changes during the simulation. Grey and yellow balls stand for C and S atoms.

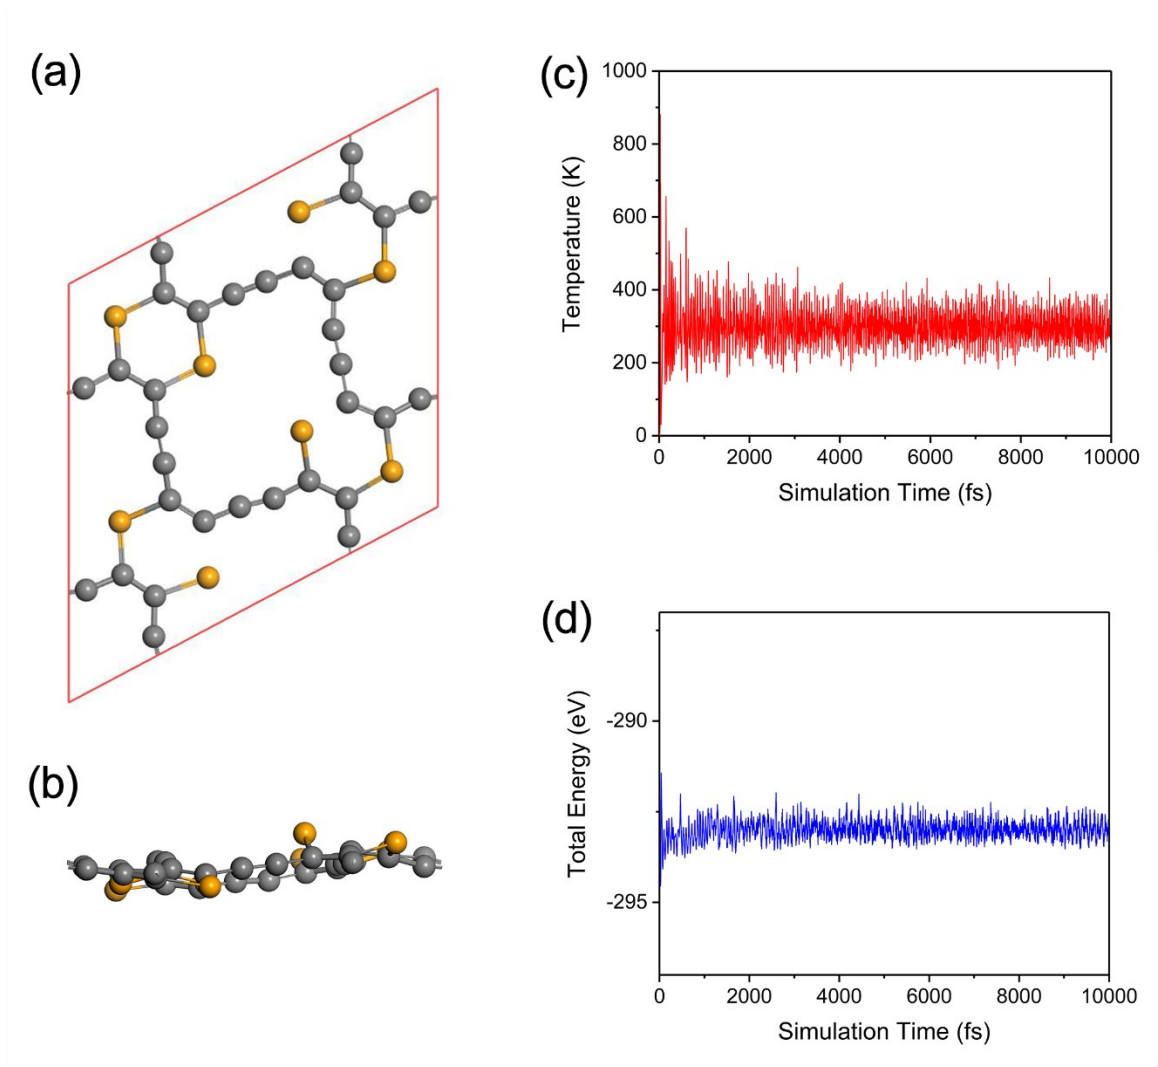

**Fig. S6** (a) Top view and (b) side view of  $\gamma$ -C<sub>4</sub>Se after 10 ps FPMD simulation at 300K, and (c) temperature and (d) energy changes during the simulation. Grey and brown balls stand for C and Se atoms.

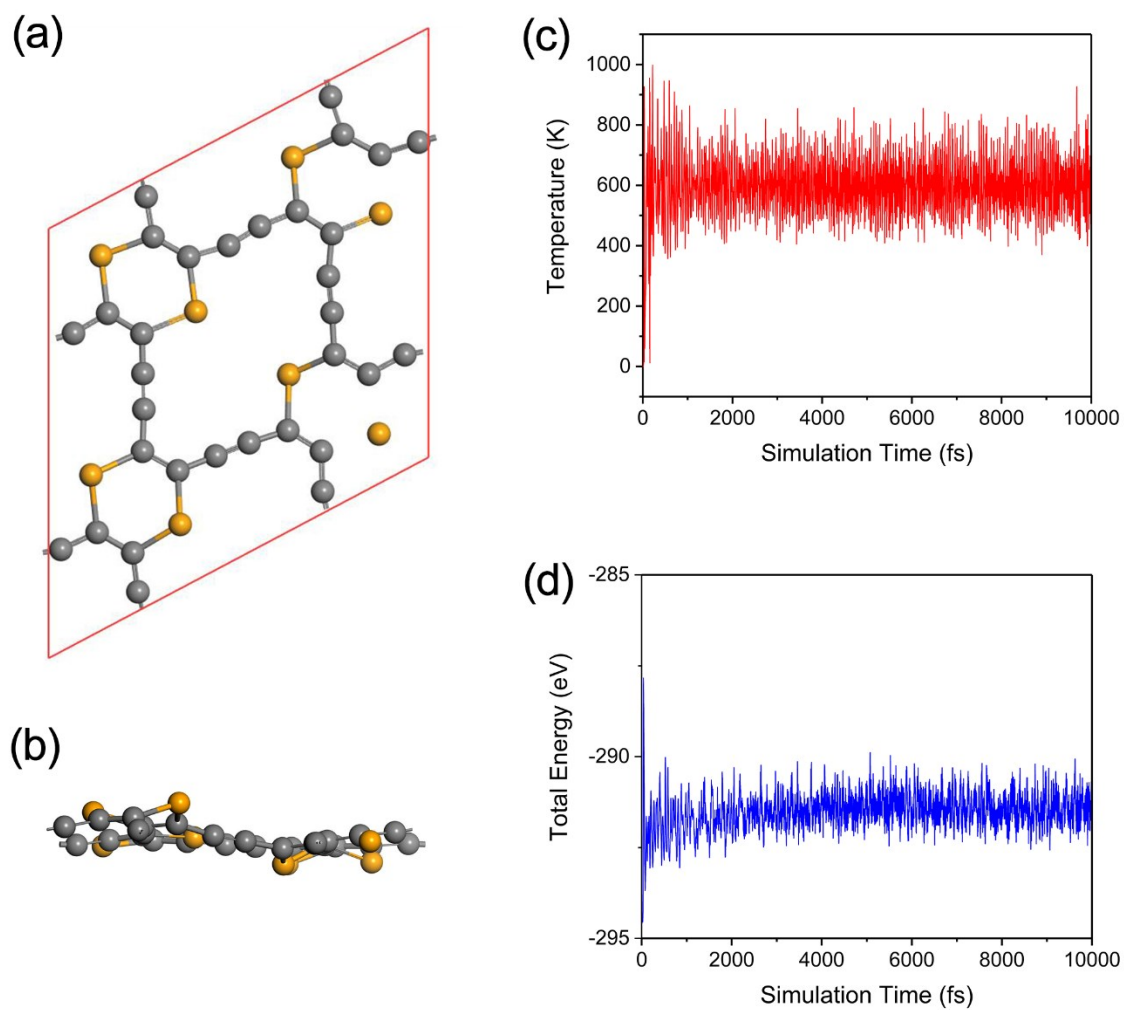

**Fig. S7** (a) Top view and (b) side view of  $\gamma$ -C<sub>4</sub>Se after 10 ps FPMD simulation at 600K, and (c) temperature and (d) energy changes during the simulation. Grey and brown balls stand for C and Se atoms.

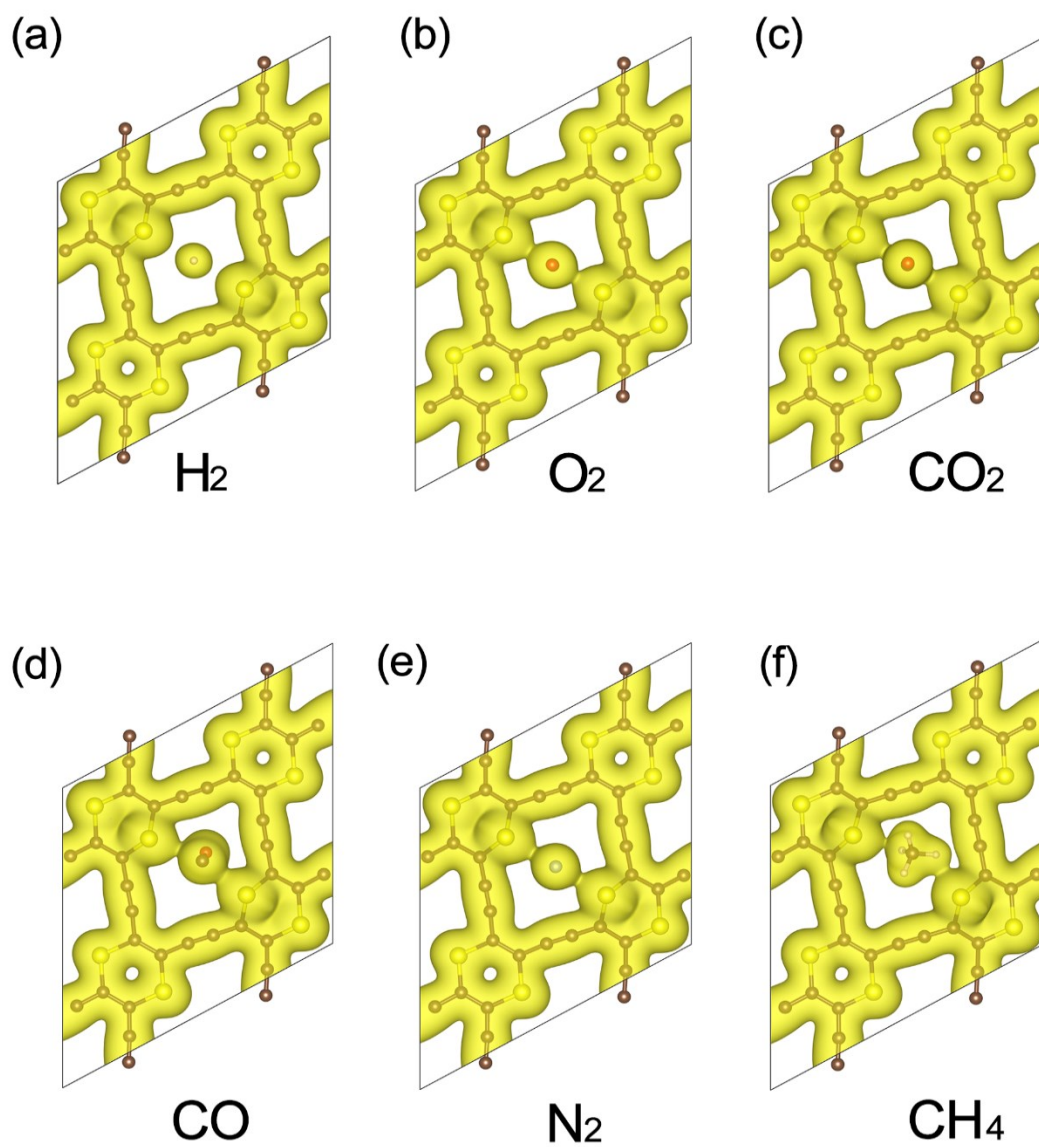

**Fig. S8** Electron densities of the TS structures for  $\text{H}_2$ ,  $\text{O}_2$ ,  $\text{CO}_2$ ,  $\text{CO}$ ,  $\text{N}_2$  and  $\text{CH}_4$  penetrating  $\gamma\text{-C}_4\text{S}$ . The isovalue is  $0.021 \text{ e } \text{\AA}^{-3}$ .

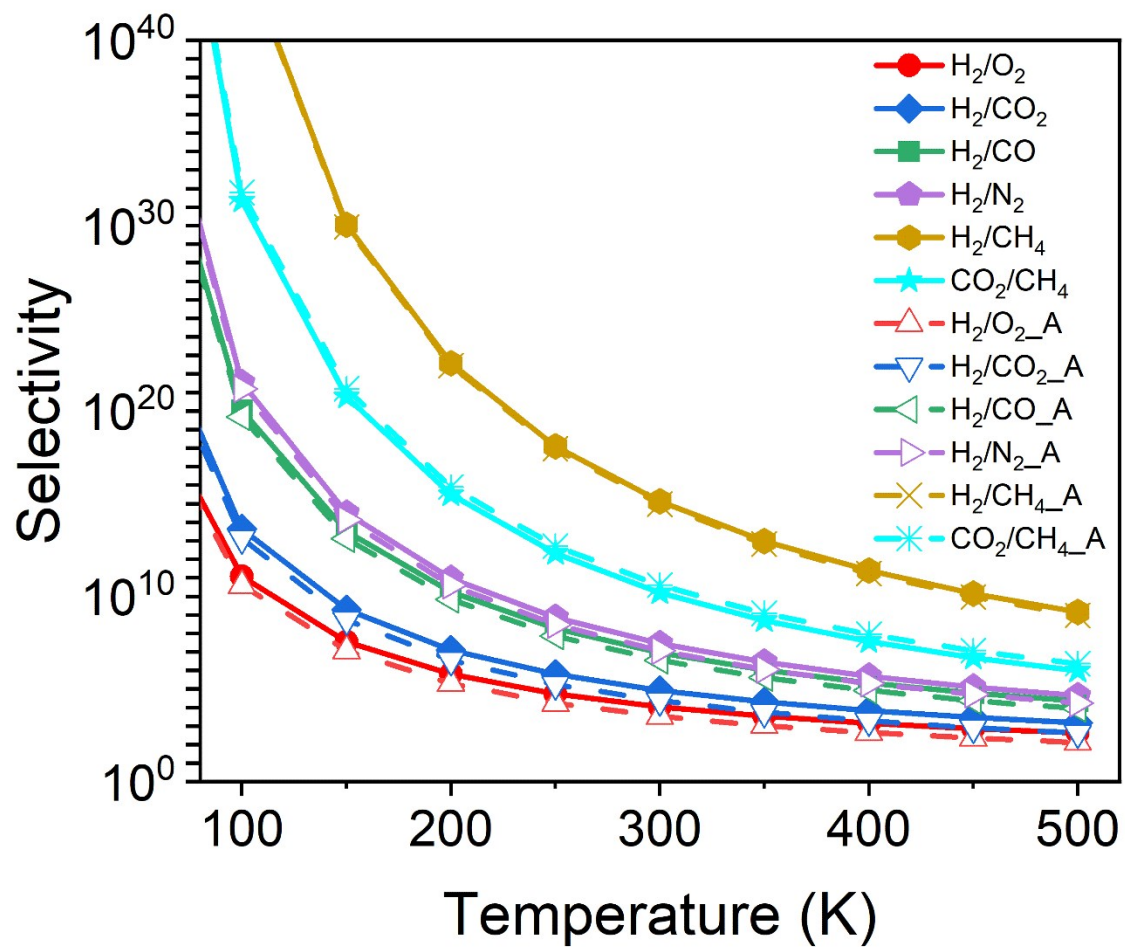

**Fig. S9** Selectivity *versus* temperature for  $H_2/O_2$ ,  $H_2/CO_2$ ,  $H_2/CO$ ,  $H_2/N_2$ ,  $H_2/CH_4$  and  $CO_2/CH_4$  separation by  $\gamma$ - $C_4O$ . The solid and dash lines stand for selectivity derived from the permeance and from the diffusion rate, respectively.

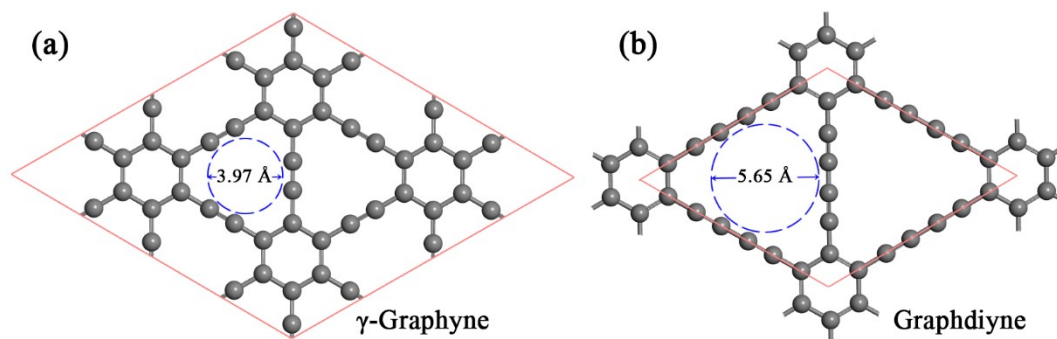

**Fig. S10** The geometric structure of (a)  $\gamma$ -graphyne and (b) graphdiyne, with the size of intrinsic pore being marked.

**Table S1.** Top view and side view of the structures of Initial State (IS), Transition State (TS) and Final State (FS) for H<sub>2</sub>, O<sub>2</sub>, CO<sub>2</sub>, CO, N<sub>2</sub> and CH<sub>4</sub> passing through the intrinsic pore of  $\gamma$ -C<sub>4</sub>O.

|                 |           | IS                                                                                  | TS                                                                                    | FS                                                                                    |
|-----------------|-----------|-------------------------------------------------------------------------------------|---------------------------------------------------------------------------------------|---------------------------------------------------------------------------------------|
| H <sub>2</sub>  | Top View  | 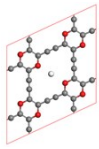   | 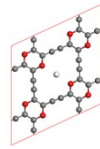   | 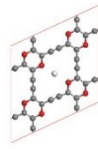   |
|                 | Side View | 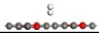   | 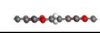   | 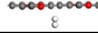   |
| O <sub>2</sub>  | Top View  | 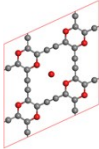   | 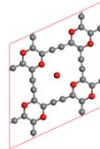   | 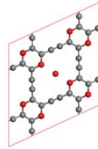   |
|                 | Side View | 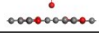   | 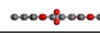   | 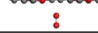   |
| CO <sub>2</sub> | Top View  | 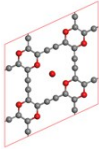   | 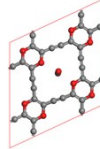   | 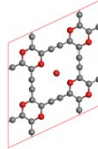   |
|                 | Side View | 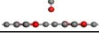 | 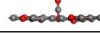 | 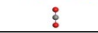 |
| CO              | Top View  | 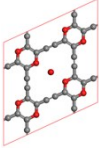 | 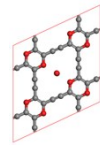 | 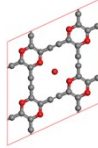 |
|                 | Side View | 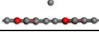 | 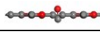 | 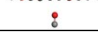 |
| N <sub>2</sub>  | Top View  | 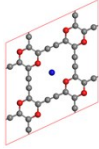 | 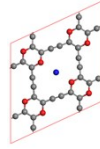 | 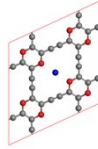 |
|                 | Side View | 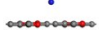 | 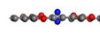 | 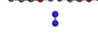 |
| CH <sub>4</sub> | Top View  | 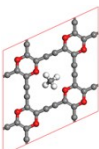 | 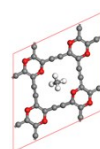 | 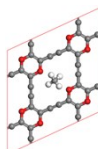 |
|                 | Side View | 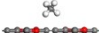 | 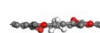 | 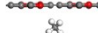 |

**Table S2.** Top view and side view of the structures of IS, TS and FS for H<sub>2</sub>, O<sub>2</sub>, CO<sub>2</sub>, CO, N<sub>2</sub> and CH<sub>4</sub> passing through the intrinsic pore of  $\gamma$ -C<sub>4</sub>S.

|                 |           | IS                                                                                  | TS                                                                                    | FS                                                                                    |
|-----------------|-----------|-------------------------------------------------------------------------------------|---------------------------------------------------------------------------------------|---------------------------------------------------------------------------------------|
| H <sub>2</sub>  | Top View  | 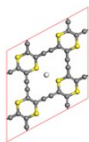   | 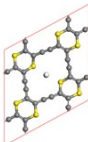   | 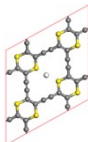   |
|                 | Side View | 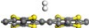   | 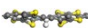   | 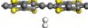   |
| O <sub>2</sub>  | Top View  | 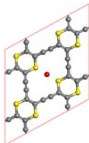   | 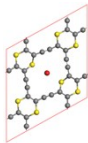   | 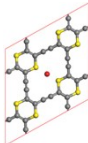   |
|                 | Side View | 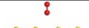   | 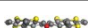   | 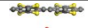   |
| CO <sub>2</sub> | Top View  | 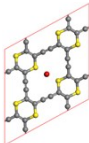   | 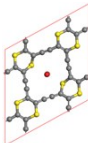   | 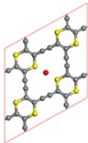   |
|                 | Side View | 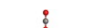   | 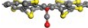   | 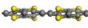   |
| CO              | Top View  | 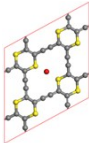 | 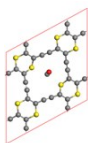 | 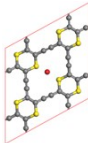 |
|                 | Side View | 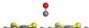 | 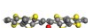 | 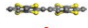 |
| N <sub>2</sub>  | Top View  | 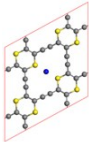 | 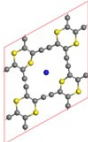 | 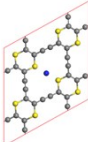 |
|                 | Side View | 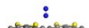 | 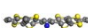 | 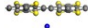 |
| CH <sub>4</sub> | Top View  | 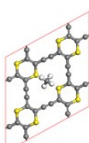 | 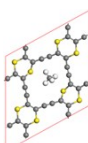 | 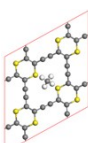 |
|                 | Side View | 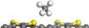 | 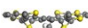 | 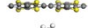 |

**Table S3.** Top view and side view of the structures of IS, TS and FS for H<sub>2</sub>, O<sub>2</sub>, CO<sub>2</sub>, CO, N<sub>2</sub> and CH<sub>4</sub> passing through the intrinsic pore of  $\gamma$ -C<sub>4</sub>N.

|                 |           | IS                                                                                  | TS                                                                                    | FS                                                                                    |
|-----------------|-----------|-------------------------------------------------------------------------------------|---------------------------------------------------------------------------------------|---------------------------------------------------------------------------------------|
| H <sub>2</sub>  | Top View  | 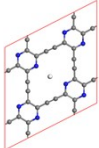   | 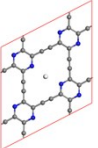   | 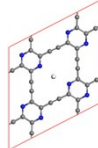   |
|                 | Side View | 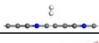   | 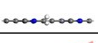   | 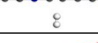   |
| O <sub>2</sub>  | Top View  | 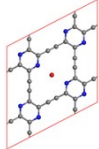   | 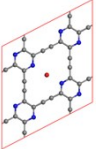   | 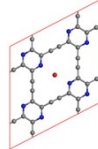   |
|                 | Side View | 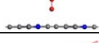   | 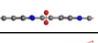   | 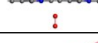   |
| CO <sub>2</sub> | Top View  | 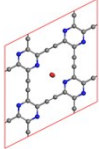   | 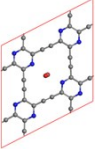   | 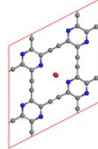   |
|                 | Side View | 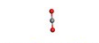   | 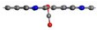   | 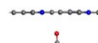   |
| CO              | Top View  | 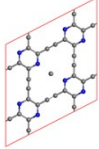 | 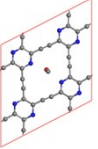 | 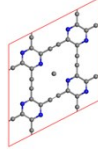 |
|                 | Side View | 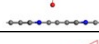 | 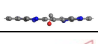 | 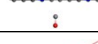 |
| N <sub>2</sub>  | Top View  | 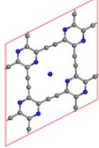 | 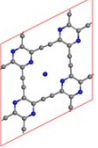 | 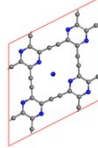 |
|                 | Side View | 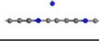 | 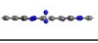 | 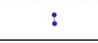 |
| CH <sub>4</sub> | Top View  | 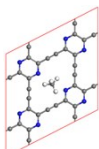 | 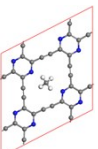 | 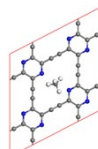 |
|                 | Side View | 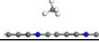 | 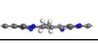 | 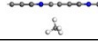 |
